# Supplementary material
Source: PubMed Central journal article supplement (PMC547837)
Supplement: pnas_102_5_1345__2.pdf [file pnas_102_5_1345__2.pdf]

**Table 2. Splice site sequences**

| <b>Intron</b>               | <b>Splice donor</b> | <b>Splice acceptor</b> |
|-----------------------------|---------------------|------------------------|
| (79) Intron A (80)          |                     |                        |
| Human                       | AGgtaact            | attctccctttcagG        |
| Mouse                       | -----tga            | g--t-att---t--A        |
| (80) Intron B (81)          |                     |                        |
| Human                       | AGgtaagg            | ttctcactcattagT        |
| Mouse                       | -----t-             | ----t---tgc----        |
| Putative cryptic in exon 80 |                     |                        |
| Human                       | AGGTTAGG            |                        |
| Mouse                       | --A-----            |                        |
| Equine                      | --A-----            |                        |
| (81) Intron C (82)          |                     |                        |
| Human                       | AAgtaagt            | ttattaaatcatagG        |
| Mouse                       | -G--g---            | --c-----c--C           |
| (82) Intron D (83)          |                     |                        |
| Human                       | <u>AAgtaagt</u> *   | tgtctctttttagG         |
| Mouse                       | -----               | --t---cc-cc----        |
| Equine                      | -----               | ---c-ct-tcc----        |

Sequences surrounding the splice donor and acceptor sites of exons 79–83 are presented. Coding nucleotides are shown in uppercase letters; noncoding nucleotides are shown in lowercase. Dashes (–) indicate sequence identity.

\*In-frame stop codon in transcript form II that retains intron D is underlined.
